# Supplementary material for: RAV1 Negatively Regulates Seed Development by Directly Repressing MINI3 and IKU2 in Arabidopsis
Source: PubMed Central journal article supplement — Mol Cells. 2018 Dec 5;41(12):1072–80. doi: 10.14348/molcells.2018.0259 (PMC6315318; doi:10.14348/molcells.2018.0259), 2018-12-05
Supplement: molce-41-12-1072-suppl2.pdf [file molce-41-12-1072-suppl2.pdf]

**Supplemental Table 1. Primer sequences used in this study**

| <b>Purpose</b> | <b>Gene</b>  | <b>Forward (5'-3')</b>                    | <b>Reverse (5'-3')</b>          |
|----------------|--------------|-------------------------------------------|---------------------------------|
| qRT-PCR        | <i>UBQ5</i>  | CGGACCAGCAGCGATTG                         | GGGTACGGCCGTCTTCAAG             |
|                | <i>RAV1</i>  | TTCGAAATCTGAGATCGTTG                      | ATCATTACTCAACCCCGACG            |
|                | <i>SHB1</i>  | CAGGTTCAAGCACTGAGGAGT                     | TGCTTCCTCGGTTTAGAGTA            |
|                | <i>ABI5</i>  | TTCATTCCCGGGTCAAGCT                       | CCTCCTGTCCTTTTAGCATAACCT        |
|                | <i>MINI3</i> | TTGACCCAATTGGAACCTCTTT                    | CGGTATGGGCATCGTCAAC             |
|                | <i>IKU2</i>  | GCTGCTAAAGGGCTGGAGTATC                    | TGCTGGACTTCACGTCTCGAT           |
| ChIP<br>PCR    | <i>MINI3</i> | RI<br>CCCAATCACATTGAAGTTTAAATG            | CCAAACTCGGTTTTGTTTTCA           |
|                |              | RII<br>GGATACACTAATATTTCTATAAAACC<br>AAAC | TGAAAACACTGAATTCTATTGTACT<br>GT |
|                |              | RIII<br>CTCTCATGCAAATCATATGGTCTA          | TGATGGTATAGTACCGTGATC           |
|                | <i>IKU2</i>  | RI<br>CACGTTGCCTTCCATAAGTCA               | GGTCATTGTAGGCGAAACAAC           |
|                |              | RII<br>GACAGGCTAGTCAACGTTACATTC           | GACCGGAGACGTGTACAAAATA          |
|                |              | RIII<br>CGTACGTGTTGGTGGTGAAGCT            | GAATGTAACGTTGACTAGCCTGTC        |
|                | <i>ABI5</i>  | RI<br>AATACGATGAATTTAATATATAAGAG<br>ACAA  | CAACTGCATCATATACACAACAAT        |
|                |              | RII<br>CAGGTTAAGCTCTAGATTATCTTTTG         | TACTCTTCCAATAAAGTTTTCGTTA<br>C  |
|                |              | RIII<br>CGAACGGATTCTTTGTCTCTG             | TAAATGGGTAGGAGGCGGT             |
